RESEARCH ARTICLE

# Perioperative risk factors for postoperative pneumonia after major oral cancer surgery: A retrospective analysis of 331 cases

Jieyun Xu<sup>1,2</sup>, Jing Hu<sup>1,2</sup>, Pei Yu<sup>1,2</sup>, Weiwang Wang<sup>1,2</sup>, Xingxue Hu<sup>3,4</sup>, Jinsong Hou<sup>1,2</sup>, Silian Fang<sup>5\*</sup>, Xiqiang Liu<sup>1,2\*</sup>

**1** Department of Oral Maxillofacial–Head & Neck Oncology, Guanghua School of Stomatology, Hospital of Stomatology, Sun Yat-sen University, Guangzhou, China, **2** Guangdong Provincial Key Laboratory of Stomatology, Guangzhou, China, **3** Department of Immunology and Infectious Diseases, the Forsyth Institute, Cambridge, Massachusetts, United States of America, **4** Division of General Practice and Materials Science, the Ohio State University College of Dentistry, Columbus, Ohio, United States of America, **5** Department of Oral and Maxillofacial Surgery, the Sixth Affiliated Hospital, Sun Yat-sen University, Guangzhou, China

☞ These authors contributed equally to this work.

\* [fangsilian@126.com](mailto:fangsilian@126.com) (SF); [liuxiq@mail.sysu.edu.cn](mailto:liuxiq@mail.sysu.edu.cn) (XL)

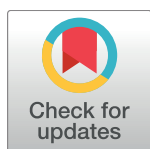

**OPEN ACCESS**

**Citation:** Xu J, Hu J, Yu P, Wang W, Hu X, Hou J, et al. (2017) Perioperative risk factors for postoperative pneumonia after major oral cancer surgery: A retrospective analysis of 331 cases. PLoS ONE 12(11): e0188167. <https://doi.org/10.1371/journal.pone.0188167>

**Editor:** Tony T. Wang, SRI International, UNITED STATES

**Received:** September 7, 2017

**Accepted:** November 1, 2017

**Published:** November 14, 2017

**Copyright:** © 2017 Xu et al. This is an open access article distributed under the terms of the [Creative Commons Attribution License](https://creativecommons.org/licenses/by/4.0/), which permits unrestricted use, distribution, and reproduction in any medium, provided the original author and source are credited.

**Data Availability Statement:** All relevant data are within the paper and its Supporting Information files.

**Funding:** The present study was supported by grants from the National Natural Science Foundation of China (81372885, 81772889, 81702699), the Major Special Research Collaborative Innovation of Guangzhou (201604020160), and the China Postdoctoral Science Foundation (2017M612826). The funders had no role in study design, data collection and

## Abstract

### Objective

Postoperative pneumonia (POP) is common and results in prolonged hospital stays, higher costs, increased morbidity and mortality. However, data on the incidence and risk factors of POP after oral and maxillofacial surgery are rare. This study aims to identify perioperative risk factors for POP after major oral cancer (OC) surgery.

### Methods

Perioperative data and patient records of 331 consecutive subjects were analyzed in the period of April 2014 to March 2016. We individually traced each OC patient for a period to discharge from the hospital or 45 days after surgery, whichever occur later.

### Results

The incidence of POP after major OC surgery with free flap construction or major OC surgery was 11.6% or 4.5%, respectively. Patient-related risk factors for POP were male sex, T stage, N stage, clinical stage and preoperative serum albumin level. Among the investigated procedure-related variables, incision grade, mandibulectomy, free flap reconstruction, tracheotomy, intraoperative blood loss, and the length of the operation were shown to be associated with the development of POP. Postoperative hospital stay was also significantly related to increased incidence of POP. Using a multivariable logistic regression model, we identified male sex, preoperative serum albumin level, operation time and postoperative hospital stay as independent risk factors for POP.

analysis, decision to publish, or preparation of the manuscript.

**Competing interests:** The authors have declared that no competing interests exist.

## Conclusion

Several perioperative risk factors can be identified that are associated with POP. At-risk oral cancer patients should be subjected to intensified postoperative pulmonary care.

## Introduction

Postoperative pneumonia (POP) is common and results in prolonged hospital stays, higher costs, increased morbidity and mortality [1]. Incidence rates for POP have been reported between 0.49% and 54.3%, depending on the type of surgery and patient population [2, 3]. POP has been shown to be associated with both patient-related and procedure-related risk factors [4, 5]. Multiple variables including advanced age, male sex, poor underlying medical condition, surgery and a higher American Society of Anesthesiologists (ASA) grade, tracheotomy and reintubation [5–10] shown to be associated with an increased risk of POP.

Major surgical procedure of advanced head and neck cancer involves radical tumor resection, lymphadenectomy, reconstruction, tracheotomy, and base of skull cancer surgery [11, 12]. In particular, microvascular free flaps are the most extensively used for large defects reconstruction in the recent past. Hence, major head and neck surgical patients may be at particularly high risk for POP, as many of the variables associated with an increased risk of POP are inherent comorbidities. Postoperative pulmonary complications rates in head and neck reconstructive patients have been variously at 7.1% to 32.7% [13–15]. The increased incidences of POP in head and neck surgery have been related to advanced ages, male gender, tracheotomy, long operative time and delayed mobilization [10, 13, 16]. However, as essential parts of head and neck cancer, a paucity of data exists regarding POP in OC patients. Similar major surgeries procedures were carried forward in OC. To our knowledge, there are no studies that have explored the role of patient- and procedure-related risk factors for POP in patients with major oral cancer surgery.

The purpose of this study was therefore to determine the incidence of POP among patients undergoing major oral cancer resection, and in particular to compare the incidence of this complication between patients with or without free flap reconstruction. Our second goal was to clarify perioperative risk factors for the development of POP.

## Materials and methods

The study design was reviewed and has been approved by the Institutional Review Board of our hospital (ERC-[2016]-24). The need for patient informed consent was waived given that the retrospective nature of the study.

## Patients

A total of 453 consecutive patients underwent major oral cancer (OC) surgery between April 2014 and March 2016 at the Hospital of Stomatology, Sun Yat-sen University, were studied. Inclusion criteria were: patient age over 18 and major oral cancer resection with or without microsurgical free flap reconstruction. One hundred and twenty-two patients were excluded based on incomplete data or because the patient did not meet inclusion criteria (S1 Fig). Records were reviewed on all the remaining 331 patients. In addition, radiography and/or chest CT scans were analyzed.

Patient-related parameters including demographic data, preoperative comorbidities (chronic obstructive pulmonary disease [COPD], diabetes, cardiovascular diseases), primary

diagnosis (tumor location and UICC classification), American Society of Anesthesiologists (ASA) grade, preoperative serum albumin levels (SAL) were documented. The analyzed procedure-related parameters included incision grade, neck dissection, tracheotomy, mandibulectomy, type of flap reconstruction, time of surgery, intraoperative blood loss and postoperative days in the hospital. Analyzed parameters of the postoperative period were length of stay in hospital or 45 days after surgery, whichever occurred later.

## Diagnosis of postoperative pneumonia (POP)

POP was diagnosed based on a combination of clinical features, laboratory tests and chest X-ray or CT scan [17]. Charts were reviewed for the presence of fever ( $\geq 38^{\circ}\text{C}$ ), cough, shortness of breath and chest pain. Lab test emphasized elevated white blood cell count ( $>10 \times 10^9/\text{L}$ ) and positive microbiological culture of endotracheal aspirate. Chest X-ray or CT scan demonstrated sign of inflammatory infiltrates. Blood test or X-ray was used for clinical evaluation before discharge. All equivocal results were reviewed on a case-by-case basis with an experienced pulmonologist.

## Microbiological analysis

The bacteria isolated from patients' endotracheal aspirates were regarded as the pathogens of POP only if the counts of bacteria  $> 10^4$  CFU. $\text{ml}^{-1}$  in BALF (BAL fluid) cultures or  $10^5$  CFU. $\text{ml}^{-1}$  in quantitatively endotracheal aspirate cultures (QEACs) [18]. Multidrug-resistance (MDR) of pathogens was defined as resistance to at least 3 different antibiotics [19].

## Statistical analysis

Data analysis was performed using SPSS version 22 (Chicago, IL). Univariate logistic regression analysis was performed to identify risk factors of POP. All variables with a significant value of  $P < 0.05$  from univariate analysis were entered into a binary multivariate logistic regression model, which was used to identify independent predictors of POP.

## Results

Out of 331 cases included in the study, 190 (57.4%) were male and 141 (42.6%) female. The most frequent tumor entity was squamous cell carcinoma (88.5%). The most common primary sites were the tongue (42.6%), buccal mucosa (13.3%), hard palate (7.3%), gingiva (6.9%), floor of mouth (5.1%) and oropharynx (5.1%). Neck dissection and mandibulectomy were performed in 58% and 28.7% of cases, respectively.

Reconstruction was achieved with either free flap (28.4%) or pedicle flap (17.2%). The most frequently used free flaps were anterolateral thigh free flap (15.4%) followed by radial forearm free flap (7.6%) and fibular bone free flap (5.4%). Tracheotomy (32.9%) was added to guarantee the airway of patients.

A total of 15 (4.5%) patients had POP. Of which, 11 were performed major OC surgery with free flap construction (11.6% of POP incidence). The male gender was significantly associated with POP ( $P = 0.021$ ). Of the 15 cases developing POP, 14 (93.3%) were male. Patients with tumors on floor of mouth ( $P = 0.001$ ), a lower preoperative SAL ( $P = 0.005$ ), advanced T stage ( $P = 0.004$ ), advanced clinical stage ( $P = 0.008$ ), and lymph node metastasis ( $P = 0.018$ ) had a significantly increased risk for POP (Table 1). Moreover, procedure-related variables including incision type ( $P = 0.007$ ), free flap reconstruction ( $P = 0.010$ ), mandibulectomy ( $P < 0.001$ ), tracheotomy ( $P < 0.001$ ), operation time ( $P < 0.001$ ) and intraoperative blood loss ( $P = 0.003$ ) was significantly associated with an increased risk for POP (Table 2). As

**Table 1. Univariate analysis of patient-related parameters.**

| Parameter                | POP          |              | OR     | 95% CI     | P value |
|--------------------------|--------------|--------------|--------|------------|---------|
|                          | Yes (n = 15) | No (n = 316) |        |            |         |
| Age                      | 50.5 [11.3]  | 54.0 [13.0]  | 0.98   | 0.94–1.02  | 0.314   |
| Male                     | 14           | 176          | 11.14  | 1.45–85.72 | 0.021   |
| Smoking                  | 8            | 98           | 2.56   | 0.89–7.14  | 0.393   |
| Alcohol abuse            | 4            | 45           | 2.17   | 0.67–7.14  | 0.196   |
| Underlying disease       | 3            | 67           | 1.08   | 0.30–3.92  | 0.911   |
| Preoperative SAL (mg/dL) | 36.3 [3.3]   | 41.7 [3.1]   | 0.79   | 0.67–0.94  | 0.005   |
| Tumor sites              |              |              |        |            | 0.001   |
| Tongue                   | 5            | 136          | 1.140  | 0.30–4.34  | 0.848   |
| Cheek                    | 1            | 43           | 0.721  | 0.08–6.63  | 0.773   |
| Floor of mouth           | 5            | 12           | 11.923 | 2.84–50.00 | 0.001   |
| Others                   | 4            | 125          |        |            |         |
| T stage                  |              |              |        |            | 0.004   |
| T1-2                     | 7            | 253          | 0.22   | 0.08–0.62  |         |
| T3-4                     | 8            | 63           |        |            |         |
| N stage                  |              |              |        |            | 0.018   |
| N0                       | 6            | 223          | 0.28   | 0.1–0.8    |         |
| N1-2                     | 9            | 93           |        |            |         |
| Clinical stage           |              |              |        |            | 0.008   |
| 1–2                      | 3            | 186          | 0.18   | 0.05–0.63  |         |
| 3–4                      | 12           | 130          |        |            |         |
| ASA grade                |              |              |        |            | 0.072   |
| 1–2                      | 10           | 268          | 0.36   | 0.12–1.09  |         |
| 3–4                      | 5            | 48           |        |            |         |

<https://doi.org/10.1371/journal.pone.0188167.t001>

expected, patients who developed POP spent a significantly longer time in the hospital after operation (22.27±8.36 vs. 11.70±6.83, OR = 1.14,  $P < 0.001$ ).

To identify those perioperative parameters that independently predict POP, all the above significant parameters have been entered into a multivariate logistic regression analysis. A significant association with POP was identified for patients with male gender ( $P = 0.017$ ), lower preoperative SAL ( $P = 0.028$ ), longer operation time ( $P = 0.014$ ) and longer postoperative hospital stay ( $P = 0.002$ ) (Table 3).

**Table 2. Univariate analysis of procedure-related parameters.**

| Parameter          | POP          |              | OR    | 95% CI      | P value |
|--------------------|--------------|--------------|-------|-------------|---------|
|                    | Yes (n = 15) | No (n = 316) |       |             |         |
| Incision grade     |              |              |       |             | 0.007   |
| 1–2                | 9            | 275          | 0.22  | 0.08–0.66   |         |
| 3–4                | 6            | 41           |       |             |         |
| Free Flap          | 11           | 84           | 4.08  | 1.41–11.76  | 0.010   |
| Tracheotomy        | 13           | 96           | 14.28 | 3.33–50.00  | <0.001  |
| Neck Dissection    | 12           | 180          | 3.03  | 0.83–11.11  | 0.092   |
| Mandibulectomy     | 12           | 83           | 11.11 | 3.12–33.33  | <0.001  |
| Blood Loss (L)     | 0.9 [0.7]    | 0.4 [0.5]    | 3.045 | 1.479–6.272 | 0.003   |
| Operation time (h) | 9.7 [2.7]    | 4.6 [3.6]    | 1.38  | 1.18–1.61   | <0.001  |

<https://doi.org/10.1371/journal.pone.0188167.t002>

**Table 3. Independent risk factors for POP by multivariate analysis.**

| Parameter                       | P value | OR    | 95% CI      |
|---------------------------------|---------|-------|-------------|
| Male                            | 0.017   | 16.73 | 1.67–167.81 |
| Preoperative SAL (mg/dL)        | 0.028   | 0.80  | 0.65–0.98   |
| Operation time (h)              | 0.014   | 1.30  | 1.06–1.60   |
| Postoperative hospital stay (d) | 0.002   | 1.14  | 1.05–1.24   |

<https://doi.org/10.1371/journal.pone.0188167.t003>

For identification of the bacterial spectrum in POP patients, endotracheal aspirate had been performed. A total of 9 different kinds of pathogens were isolated. Predominant pathogens were further identified in 11 of the 15 POP patients (Table 4). Particularly, our drug susceptibility test showed that multidrug-resistance (MDR) of the cultured bacteria was existed in 4 out of the 11 POP patients. The most common MDR bacteria were *Klebsiella pneumoniae* (2/4, 50.0%). (Table 4).

## Discussion

One of the main findings of this study is that the incidence of POP after radical oral cancer resection was 4.5%. In this investigated surgical cohort with free flap reconstruction, the rate of POP was 11.6%. The risk factors associated with the development of POP in the multivariate analysis were male gender, a low preoperative SAL, longer operation time and delayed postoperative hospital stay.

About the incidence of POP or postoperative pulmonary complications after oral cancer surgery, the literature ranges between 5.1% and 30.6% [6, 10, 20, 21]. These disparities may be explained by different definitions of POP, different diagnostic methods applied and heterogeneity of surgical populations among studies. The incidence reported by us fits with the results of the comparable literature in the low range of the incidence reported.

POP is one kind of hospital-acquired pneumonia and bacteria are one of the crucial pathogens. However, literature regarding the bacteria pathogens and POP in patients with oral cancer surgery is limited. Akutsu Y et al. reported that pathogens in preoperative dental plaque are risk factors for POP following thoracotomy in patients undergoing esophagectomy [22]. In 73.3% of cases we could isolate a bacteria pathogen. Interestingly, Gram-negative bacilli were the principal microorganisms (89%). These findings coincide with previous reports [23–25] and suggest that a broad initial antimicrobial treatment, including Gram-negative coverage, is necessary when treating these pneumonias with antibiotics. Of note, as prophylactic antibiotics abused in the past decades, multidrug resistance (MDR) against bacteria pathogens is increasing. Moolchandani et al. found the prevalence of multidrug resistant Gram-negative bacilli (MDR-GNB) in hospital-acquired infections reached 55.7% [19]. In our study, 26.7% of the

**Table 4. Bacterial spectrum of POP cases.**

| No. | Pathogenic bacteria                 | MDR |
|-----|-------------------------------------|-----|
| 1   | <i>Stenotrophomonas maltophilia</i> |     |
| 2   | <i>Prevotella melaninogenica</i>    |     |
|     | <i>Klebsiella pneumoniae</i>        |     |
| 3   | MRSA                                | (+) |
| 4   | <i>Klebsiella pneumoniae</i>        | (+) |
|     | <i>Pseudomonas aeruginosa</i>       |     |
| 5   | <i>Haemophilus influenzae</i>       | (+) |
| 6   | <i>Pseudomonas aeruginosa</i>       |     |

<https://doi.org/10.1371/journal.pone.0188167.t004>

pathogens, including *Klebsiella pneumoniae*, MRSA and *Haemophilus influenzae* are present MDR. Hence, perioperative antimicrobial monitoring and drug susceptibility test for guiding clinical medication is indispensable.

In our study, male gender, a low preoperative SAL, longer operation time and delayed postoperative hospital stay were identified as being associated with a higher risk for POP in the multivariate analysis. Evidence from other studies suggested that male sex might be a risk factor for POP [5, 6, 26]. A proposed explanation for the finding might be that, in our patient population, smoking was significantly more often present in male (53.7% vs. 2.8%,  $P < 0.05$ ). Of the 15 POP cases, 14 (93.3%) were male, and of the 106 smokers, 103 (97.2%) were male.

Low serum albumin level (SAL) ( $< 35$  mg/dL), or hypoalbuminemia, is a well-documented risk factor for postoperative pulmonary complications in many patient populations [27, 28]. The ACP guidelines for preoperative pulmonary risk stratification contain good or fair evidence for low SAL being powerful predictor for postoperative complications after noncardiothoracic surgery in general [29]. In agreement with these findings, patients who developed POP had a significantly lower SAL in this cohort. Our results further confirmed that low preoperative SAL was an independent predictor for POP. In this regard, optimizing nutritional status prior to oral cancer surgery would improve the surgical outcome.

Numerous reasons can be proposed for the association between operation time and POP. First, a prolonged operation time ( $> 3$  h) results in longer duration of anesthesia and mechanical ventilation. Maintenance of intubation anesthesia and prolonged mechanical ventilation led to abnormality of deglutition and respiration, gas exchange and atelectasis [30]. Accordingly, both type and time of anesthesia have been reported to be associated with incidence of POP, and longer mechanical ventilation was related to an increased incidence of POP [31–33]. Second, complicated procedures including lymphadenectomy and free flap reconstruction require longer operation time. To date, free flap reconstruction has become an integral part of the multidisciplinary treatment of oral cancers in most major medical centers. However, the perioperative course remains complex and postoperative pulmonary complications are common [10, 13]. Moreover, intraoperative fluid management got more complex as time prolonged, accompanied by higher risk of fluid overload and postoperative pulmonary complications [5]. As we know, blood loss is a critical indicator for fluid transfusion, and our study showed the blood patients with POP lost is more than the double of those without POP (mean, 900mL vs. 400mL,  $P = 0.003$ ).

Strength of our study is that we paid special attention to avoid POP. One avoidance strategy comprises a comprehensive perioperative evaluation of the patient. Patients with one or more of the above mentioned risk factors for POP, had been identified and subjected to more careful monitoring and respiratory care. As the ACP recommended [28], postoperative respiratory care including selective use of a nasogastric tube, postural drainage, percussion and vibration, deep breathing exercises, suctioning, early mobilization and chest physiotherapy were routinely performed as effective methods for reducing POP.

A limitation of this study is its retrospective nature. All of the analyzed data were drawn from archived hospital database. Consequently, the influence of undocumented variables, e.g., BMI, type of perioperative administered antibiotics, intraoperative oxygenation index, could not be determined. Secondly, our study lack comparison between various types of anesthesia in effects on POP, since all of our major oral cancer surgeries were operated under endotracheal general anesthesia. In addition, without a priori sample size estimation might led to leave out some risk factors.

In conclusion, we can state that major oral cancer surgery with free flap reconstruction and tracheotomy is associated with a high risk for the development of POP. In our investigated cohort, male gender, low SAL and prolonged operation time have been identified as independent

risk factors for POP. In order to mitigate POP and possible sequelae, patients with one or more of these risk factors should be subject to intensified monitoring and perioperative care.

## Supporting information

**S1 Fig. Flowchart of patients' enrollment.** The patients' data were obtained from a single institution during a period between August 2014 and March 2016. We retrospectively reviewed the data and retrieved data of oral cancer patients (n = 453). We excluded patients with recurrent or secondary oral cancers, or those with other malignancies (n = 68). Patients with poor performance status (ECOG  $\geq$  3), liver cirrhosis, renal failure or poor heart or lung function, or who were unfit for flap reconstruction surgery, were also excluded to reduce bias and confounding factors (n = 50). Incomplete or missing medical records were excluded (n = 4). Finally, a total of 331 patients (190 male, 141 female) with primary oral cancer who received curative surgery and flap reconstruction were studied.  
(RAR)

## Acknowledgments

The author would like to acknowledge Lin Wang for collection of data from Hospital of Stomatology, Sun Yat-sen University. We would also like to acknowledge all the staff from Laboratory Department of Hospital of Stomatology for their work in pathogen detection.

## Author Contributions

**Conceptualization:** Xiqiang Liu.

**Data curation:** Jieyun Xu, Jing Hu.

**Formal analysis:** Jieyun Xu, Jing Hu.

**Funding acquisition:** Pei Yu, Xiqiang Liu.

**Investigation:** Jieyun Xu, Jing Hu, Weiwang Wang.

**Methodology:** Jinsong Hou, Xiqiang Liu.

**Project administration:** Jinsong Hou, Xiqiang Liu.

**Resources:** Jinsong Hou, Xiqiang Liu.

**Supervision:** Xiqiang Liu.

**Validation:** Xingxue Hu, Jinsong Hou, Silian Fang, Xiqiang Liu.

**Visualization:** Jieyun Xu, Jing Hu.

**Writing – original draft:** Jieyun Xu, Jing Hu, Pei Yu, Weiwang Wang.

**Writing – review & editing:** Jieyun Xu, Jing Hu, Silian Fang, Xiqiang Liu.

## References

1. Sabate S, Mazo V, Canet J. Predicting postoperative pulmonary complications: implications for outcomes and costs. *Curr Opin Anaesthesiol.* 2014; 27(2):201–9. <https://doi.org/10.1097/ACO.000000000000045> PMID: 24419159
2. Chughtai M, Gwam CU, Mohamed N, Khlopas A, Newman JM, Khan R, et al. The Epidemiology and Risk Factors for Postoperative Pneumonia. *J Clin Med Res.* 2017; 9(6):466–75. <https://doi.org/10.14740/jocmr3002w> PMID: 28496546



3. Ailawadi G, Chang HL, O’Gara PT, O’Sullivan K, Woo YJ, DeRose JJ, et al. Pneumonia after cardiac surgery: Experience of the National Institutes of Health/Canadian Institutes of Health Research Cardiothoracic Surgical Trials Network. *J Thorac Cardiovasc Surg.* 2017; 153(6):1384–91.e3. <https://doi.org/10.1016/j.jtcvs.2016.12.055> PMID: 28341473
4. Sachdev G, Napolitano LM. Postoperative Pulmonary Complications: Pneumonia and Acute Respiratory Failure. *Surg Clin North Am.* 2012; 92(2):321–44. <https://doi.org/10.1016/j.suc.2012.01.013> PMID: 22414416
5. Loeffelbein DJ, Julinek A, Wolff K-D, Kochs E, Haller B, Haseneder R. Perioperative risk factors for postoperative pulmonary complications after major oral and maxillofacial surgery with microvascular reconstruction: A retrospective analysis of 648 cases. *J Cranio Maxill Surg.* 2016; 44(8):952–7.
6. Li L, Yuan W, Zhang S, Wang K, Ruan H. Analysis of Risk Factors for Pneumonia in 482 Patients Undergoing Oral Cancer Surgery With Tracheotomy. *J Oral Maxillofac Surg.* 2016; 74(2):415–9. <https://doi.org/10.1016/j.joms.2015.08.018> PMID: 26408101
7. Petrar S, Bartlett C, Hart RD, MacDougall P. Pulmonary complications after major head and neck surgery: A retrospective cohort study. *Laryngoscope.* 2012; 122(5):1057–61. <https://doi.org/10.1002/lary.23228> PMID: 22447296
8. Semenov YR, Starmer HM, Gourin CG. The effect of pneumonia on short-term outcomes and cost of care after head and neck cancer surgery. *Laryngoscope.* 2012; 122(9):1994–2004. <https://doi.org/10.1002/lary.23446> PMID: 22777881
9. Trinh VQ, Ravi P, Abd-El-Barr AE, Jhaveri JK, Gervais MK, Meyer CP, et al. Pneumonia after Major Cancer Surgery: Temporal Trends and Patterns of Care. *Can Respir J.* 2016; 2016:6019416. <https://doi.org/10.1155/2016/6019416> PMID: 27445554
10. Yeung JK, Harrop R, McCreary O, Leung LT, Hirani N, McKenzie D, et al. Delayed mobilization after microsurgical reconstruction: an independent risk factor for pneumonia. *Laryngoscope.* 2013; 123(12):2996–3000. <https://doi.org/10.1002/lary.24241> PMID: 23754486
11. Shah JP, Gil Z. Current concepts in management of oral cancer—surgery. *Oral Oncol.* 2009; 45(4–5):394–401. <https://doi.org/10.1016/j.oraloncology.2008.05.017> PMID: 18674952
12. Yoo SH, Roh J-L, Choi S-H, Nam SY, Kim SY. Incidence and risk factors for morbidity and mortality in elderly head and neck cancer patients undergoing major oncological surgery. *J Cancer Res Clin Oncol.* 2016; 142(6):1343–51. <https://doi.org/10.1007/s00432-016-2141-4> PMID: 26979590
13. Damian D, Esquenazi J, Duvvuri U, Johnson JT, Sakai T. Incidence, outcome, and risk factors for postoperative pulmonary complications in head and neck cancer surgery patients with free flap reconstructions. *J Clin Anesth.* 2016; 28:12–8. <https://doi.org/10.1016/j.jclinane.2015.08.007> PMID: 26796608
14. Ligh CA, Nelson JA, Wink JD, Gerety PA, Fischer JP, Wu LC, et al. An analysis of early oncologic head and neck free flap reoperations from the 2005–2012 ACS-NSQIP dataset. *J Plast Surg Hand Surg.* 2016; 50(2):85–92. <https://doi.org/10.3109/2000656X.2015.1106407> PMID: 26571114
15. McMahon JD, MacIver C, Smith M, Stathopoulos P, Wales C, McNulty R, et al. Postoperative complications after major head and neck surgery with free flap repair prevalence, patterns, and determinants: a prospective cohort study. *Br J Oral Maxillofac Surg.* 2013; 51(8):689–95. <https://doi.org/10.1016/j.bjoms.2013.04.015> PMID: 23727043
16. Molena D, Mungo B, Stem M, Lidor AO. Incidence and risk factors for respiratory complications in patients undergoing esophagectomy for malignancy: a NSQIP analysis. *Semin Thorac Cardiovasc Surg.* 2014; 26(4):287–94. <https://doi.org/10.1053/j.semtcvs.2014.12.002> PMID: 25837540
17. Dupont H, Montravers P, Gauzit R, Veber B, Pouriart J-L, Martin C. Outcome of postoperative pneumonia in the Eole study. *Intensive Care Med.* 2003; 29(2):179–88. <https://doi.org/10.1007/s00134-002-1603-0> PMID: 12594582
18. Corrêa RDA, Luna CM, Anjos JCFV, Barbosa EA, Rezende CJD, Rezende AP, et al. Quantitative culture of endotracheal aspirate and BAL fluid samples in the management of patients with ventilator-associated pneumonia: a randomized clinical trial. *J Bra Pneumol.* 2014; 40(6):643–51.
19. Moolchandani K, Sastry AS, Deepashree R, Sistla S, Harish BN, Mandal J. Antimicrobial Resistance Surveillance among Intensive Care Units of a Tertiary Care Hospital in Southern India. *J Clin Diagn Res.* 2017; 11(2):DC01–DC7. <https://doi.org/10.7860/JCDR/2017/23717.9247> PMID: 28384858
20. Schwam ZG, Sosa JA, Roman S, Judson BL. Complications and mortality following surgery for oral cavity cancer: analysis of 408 cases. *Laryngoscope.* 2015; 125(8):1869–73. <https://doi.org/10.1002/lary.25328> PMID: 26063059
21. Dillon JK, Liu SY, Patel CM, Schmidt BL. Identifying risk factors for postoperative cardiovascular and respiratory complications after major oral cancer surgery. *Head Neck.* 2011; 33(1):112–6. <https://doi.org/10.1002/hed.21411> PMID: 20578073



22. Akutsu Y, Matsubara H, Okazumi S, Shimada H, Shuto K, Shiratori T, et al. Impact of preoperative dental plaque culture for predicting postoperative pneumonia in esophageal cancer patients. *Dig Surg*. 2008; 25(2):93–7. <https://doi.org/10.1159/000121903> PMID: 18379186
23. Chen P, A Y, Hu Z, Cun D, Liu F, Li W, et al. Risk factors and bacterial spectrum for pneumonia after abdominal surgery in elderly Chinese patients. *Arch Gerontol Geriatr*. 2014; 59(1):186–9. <https://doi.org/10.1016/j.archger.2014.03.007> PMID: 24742774
24. Patil HV, Patil VC. Incidence, bacteriology, and clinical outcome of ventilator-associated pneumonia at tertiary care hospital. *J Nat Sci Biol Med*. 2017; 8(1):46–55. <https://doi.org/10.4103/0976-9668.198360> PMID: 28250674
25. Sok M, Dragas AZ, Erzen J, Jerman J. Sources of pathogens causing pleuropulmonary infections after lung cancer resection. *Eur J Cardiothorac Surg*. 2002; 22(1):23–7; discussion 7–9. PMID: 12103368
26. Liu Y, Y D, Fu S. Risk factors for ventilator-associated pneumonia among patients undergoing major oncological surgery for head and neck cancer. *Front Med*. 2017; 11(2):239–46. <https://doi.org/10.1007/s11684-017-0509-8> PMID: 28493197
27. Longo WE, Virgo KS, Johnson FE, Wade TP, Vernava AM, Phelan MA, et al. Outcome after proctectomy for rectal cancer in Department of Veterans Affairs Hospitals: a report from the National Surgical Quality Improvement Program. *Ann Surg*. 1998; 228(1):64–70. PMID: 9671068
28. Silberstein JL, Adamy A, Maschino AC, Ehdai B, Garg T, Favaretto RL, et al. Systematic classification and prediction of complications after nephrectomy in patients with metastatic renal cell carcinoma (RCC). *BJU Int*. 2012; 110(9):1276–82. <https://doi.org/10.1111/j.1464-410X.2012.11103.x> PMID: 22554107
29. Smetana GW, Lawrence VA, Cornell JE. Preoperative pulmonary risk stratification for noncardiothoracic surgery: systematic review for the American College of Physicians. *Ann Intern Med*. 2006; 144(8):581–95. PMID: 16618956
30. Tusman G, Bohm SH, Warner DO, Sprung J. Atelectasis and perioperative pulmonary complications in high-risk patients. *Curr Opin Anaesthesiol*. 2012; 25(1):1–10. <https://doi.org/10.1097/ACO.0b013e32834dd1eb> PMID: 22113182
31. Poelaert J, Haentjens P, Blot S. Association among duration of mechanical ventilation, cuff material of endotracheal tube, and postoperative nosocomial pneumonia in cardiac surgical patients: a prospective study. *J Thorac Cardiovasc Surg*. 2014; 148(4):1622–7. <https://doi.org/10.1016/j.jtcvs.2014.05.085> PMID: 25127550
32. Guay J, Choi PT, Suresh S, Albert N, Kopp S, Pace NL. Neuraxial anesthesia for the prevention of postoperative mortality and major morbidity: an overview of cochrane systematic reviews. *Anesthesia and analgesia*. 2014; 119(3):716–25. <https://doi.org/10.1213/ANE.0000000000000339> PMID: 24977635
33. Hausman MS Jr., Jewell ES, Engoren M. Regional versus general anesthesia in surgical patients with chronic obstructive pulmonary disease: does avoiding general anesthesia reduce the risk of postoperative complications? *Anesthesia and analgesia*. 2015; 120(6):1405–12. <https://doi.org/10.1213/ANE.0000000000000574> PMID: 25526396
